# Supplementary material for: Interaction of Garcinia cambogia (Gaertn.) Desr. and Drugs as a Possible Mechanism of Liver Injury: The Case of Montelukast
Source: MDPI journal article supplement (doi:10.3390/antiox12091771), 2023-09-16
Supplement: s1 [file s1]

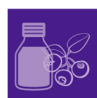

## Supplementary material

# Interaction of *Garcinia cambogia* (Gaertn.) Desr. and Drugs as a Possible Mechanism of Liver Injury: The Case of Montelukast

Silvia Di Giacomo <sup>1,2,\*</sup>, Antonella Di Sotto <sup>2,\*</sup>, Ester Percaccio <sup>2</sup>, Erica Scuotto <sup>2</sup>, Cecilia Battistelli <sup>3</sup>, Gabriela Mazzanti <sup>2</sup>, Francesca Menniti-Ippolito <sup>4</sup> and Ilaria Ippoliti <sup>4</sup>

- <sup>1</sup> Department of Food Safety, Nutrition and Veterinary Public Health, National Institute of Health, Viale Regina Elena 299, 00161 Rome, Italy
  - <sup>2</sup> Department of Physiology and Pharmacology “V. Erspamer”, Sapienza University of Rome, P.le Aldo Moro 5, 00185 Rome, Italy
  - <sup>3</sup> Department of Molecular Medicine, Sapienza University of Rome, Viale Regina Elena 324, 00161 Rome, Italy
  - <sup>4</sup> National Centre for Drug Research and Evaluation, National Institute of Health, Viale Regina Elena 299, 00161 Rome, Italy
- \* Correspondence: [silvia.digiaco@iss.it](mailto:silvia.digiaco@iss.it) (S.D.G.); [antonella.disotto@uniroma1.it](mailto:antonella.disotto@uniroma1.it) (A.D.S.)

FONTANA  
standardised natural  
active principles

| CERTIFICATO DI ANALISI - CERTIFICATE OF ANALYSIS                                                                                            |                                                                                  |                                      |                                                                                  |
|---------------------------------------------------------------------------------------------------------------------------------------------|----------------------------------------------------------------------------------|--------------------------------------|----------------------------------------------------------------------------------|
| Prodotto - Product 881134_002 GARCINIA E.S. 80% AC. BROSSOLITRICO - GARCINIA CAM. P.E. 80% HYDROXYTRIC AC.                                  |                                                                                  |                                      |                                                                                  |
| Lotto - Batch Number 52255766                                                                                                               |                                                                                  |                                      |                                                                                  |
| Produttore materia prima - Raw material manufacturer Sergio Fontana S.r.l. - Italia - Italy Via Mucellato 260 - 75012 Canosa di Puglia (BT) |                                                                                  |                                      |                                                                                  |
| Data di produzione - Manufacturing date: 28/04/2022                                                                                         |                                                                                  |                                      |                                                                                  |
| Data di analisi - Analysis date: 28/04/2022                                                                                                 |                                                                                  |                                      |                                                                                  |
| PRODOTTO                                                                                                                                    | GARCINIA ESTRATTO SECCO 80% ACIDO BROSSOLITRICO                                  | PRODUCT                              | GARCINIA CAMBOGIA POWDER EXTRACT 80% HYDROXYTRIC ACID                            |
| NOME BOTANICO                                                                                                                               | Garcinia purpurella (L.) Roxb. (syn. Garcinia cambogia (Gaertn.) Desr.)          | BOTANICAL NAME                       | Garcinia purpurella (L.) Roxb. (syn. Garcinia cambogia (Gaertn.) Desr.)          |
| FAMIGLIA BOTANICA                                                                                                                           | Celastraceae                                                                     | BOTANICAL FAMILY                     | Celastraceae                                                                     |
| NUMERO CAS                                                                                                                                  | Garcinia cambogia fruit extract: 90045-23-1                                      | CAS NUMBER                           | Garcinia cambogia fruit extract: 90045-23-1                                      |
| PARTE DELLA PIANTA                                                                                                                          | Frutti                                                                           | PART OF PLANT USED                   | Fruit                                                                            |
| PREPARAZIONE                                                                                                                                | Acqua                                                                            | SOLVENT EXTRACTION                   | Water                                                                            |
| ANALISI MATERIA PRIMA                                                                                                                       |                                                                                  | RAW MATERIAL ANALYSIS                |                                                                                  |
| TITOLO                                                                                                                                      | Attività ossidativa 56,0-62,0% p/p (HPLC)                                        | ACTIVITY                             | Hydroxytrich acid 56,0-62,0% w/w (HPLC)                                          |
| RAPPORTO E/O                                                                                                                                | Fino al 10% di cloruro (max. 1%)                                                 | EC RATIO                             | Up to 10% of chloride (approx. 1%)                                               |
| IDENTIFICAZIONE                                                                                                                             | Conferma (HPLC)                                                                  | IDENTIFICATION                       | Complex (HPLC)                                                                   |
| ASPECTO                                                                                                                                     | Polvere bianca                                                                   | APPEARANCE                           | Hydroxytrich powder                                                              |
| COLORE                                                                                                                                      | Grigio-bianco                                                                    | COLOR                                | Gray-white                                                                       |
| ODORE                                                                                                                                       | Caratteristico                                                                   | ODOUR                                | Characteristic                                                                   |
| SAPORE                                                                                                                                      | Caratteristico                                                                   | TASTE                                | Characteristic                                                                   |
| DENSITA'                                                                                                                                    | Ca. 0,5 g/ml                                                                     | DENSITY                              | Approx. 0,5 g/ml                                                                 |
| SOLUBILITA'                                                                                                                                 | Parzialmente solubile in acqua                                                   | SOLUBILITY                           | Partially water-soluble                                                          |
| PERDITA ALL'ESSICCATO                                                                                                                       | ≤ 8,0% p/p                                                                       | LOSS ON DRYING                       | ≤ 8,0% w/w                                                                       |
| METALLI PESANTI                                                                                                                             | Totale ≤ 20 ppm *                                                                | HEAVY METALS                         | Total ≤ 20 ppm *                                                                 |
| PESTICIDI                                                                                                                                   | Garcinia e Ph. Eur. ed. vigente alla data di produzione e di analisi             | PESTICIDES                           | Complex with Ph. Eur. current ed. and analysis                                   |
| AFETOSINE                                                                                                                                   | Almeno 81 ± 5 ppm; Almeno 81 ± 5 ppm; Almeno 81 ± 5 ppm                          | AFETOSINE                            | Complex (Reg. 1831/2003/EC)                                                      |
| OROGRAFICI                                                                                                                                  | ≤ 1000 u/kg (TAMC, Ph. Eur. 5.1.8, cat. B, oral use)                             | POLYCYCLIC AROMATIC HYDROCARBONS     | ≤ 1000 u/kg (TAMC, Ph. Eur. 5.1.8, cat. B, oral use)                             |
| POLIGRAFICI                                                                                                                                 | ≤ 100 u/kg (TAMC, Ph. Eur. 5.1.8, cat. B, oral use)                              | TOTAL BACTERIA                       | ≤ 100 u/kg (TAMC, Ph. Eur. 5.1.8, cat. B, oral use)                              |
| LEVITTE MUFFE                                                                                                                               | ≤ 100 u/kg (TAMC, Ph. Eur. 5.1.8, cat. B, oral use)                              | YEASTS AND MOULDS                    | ≤ 100 u/kg (TAMC, Ph. Eur. 5.1.8, cat. B, oral use)                              |
| PATOGENI                                                                                                                                    | Salmonella, Shigella, E. coli, Staphylococcus (Ph. Eur. 5.1.8, cat. B, oral use) | PATHOGENS                            | Salmonella, Shigella, E. coli, Staphylococcus (Ph. Eur. 5.1.8, cat. B, oral use) |
| BATTERI GRAM NEGATIVI RESISTENTI AI SALI BILINI                                                                                             | ≤ 100 u/kg (Ph. Eur. 5.1.8, cat. B, oral use)                                    | B.E. TOLERANT GRAM NEGATIVE BACTERIA | ≤ 100 u/kg (Ph. Eur. 5.1.8, cat. B, oral use)                                    |
| INFORMAZIONI GENERALI                                                                                                                       |                                                                                  | GENERAL NOTES                        |                                                                                  |
| NOME WGS                                                                                                                                    | Garcinia cambogia fruit extract                                                  | GEN NAME                             | Garcinia cambogia fruit extract                                                  |
| NUMERO ENCELING                                                                                                                             | Garcinia cambogia fruit extract: 280-882-6                                       | ENCELING NUMBER                      | Garcinia cambogia fruit extract: 280-882-6                                       |
| ORIGINE DELLA PIANTA                                                                                                                        | Acqua                                                                            | ORIGIN OF THE PLANT                  | Spontaneous plant                                                                |

FONTANA  
standardised natural  
active principles

| CERTIFICATO DI ANALISI - CERTIFICATE OF ANALYSIS                                                                                            |                                                                                                                                                                                                                                                                                                                                                                                                                                                                                                                                                                                                                                                                                                                                                                                                                                                                                                                                                                                                                                                                                                                                                                                                                                                                                                                                                                                                                                                                                                                                                                                                                                                                                                  |                         |                                                                                                                                                                                                                                                                                                                                                                                                                                                                                                                                                                                                                                                                                                                                                                                                                                                                                                                                                        |
|---------------------------------------------------------------------------------------------------------------------------------------------|--------------------------------------------------------------------------------------------------------------------------------------------------------------------------------------------------------------------------------------------------------------------------------------------------------------------------------------------------------------------------------------------------------------------------------------------------------------------------------------------------------------------------------------------------------------------------------------------------------------------------------------------------------------------------------------------------------------------------------------------------------------------------------------------------------------------------------------------------------------------------------------------------------------------------------------------------------------------------------------------------------------------------------------------------------------------------------------------------------------------------------------------------------------------------------------------------------------------------------------------------------------------------------------------------------------------------------------------------------------------------------------------------------------------------------------------------------------------------------------------------------------------------------------------------------------------------------------------------------------------------------------------------------------------------------------------------|-------------------------|--------------------------------------------------------------------------------------------------------------------------------------------------------------------------------------------------------------------------------------------------------------------------------------------------------------------------------------------------------------------------------------------------------------------------------------------------------------------------------------------------------------------------------------------------------------------------------------------------------------------------------------------------------------------------------------------------------------------------------------------------------------------------------------------------------------------------------------------------------------------------------------------------------------------------------------------------------|
| Prodotto - Product 881134_002 GARCINIA E.S. 80% AC. BROSSOLITRICO - GARCINIA CAM. P.E. 80% HYDROXYTRIC AC.                                  |                                                                                                                                                                                                                                                                                                                                                                                                                                                                                                                                                                                                                                                                                                                                                                                                                                                                                                                                                                                                                                                                                                                                                                                                                                                                                                                                                                                                                                                                                                                                                                                                                                                                                                  |                         |                                                                                                                                                                                                                                                                                                                                                                                                                                                                                                                                                                                                                                                                                                                                                                                                                                                                                                                                                        |
| Lotto - Batch Number 52255766                                                                                                               |                                                                                                                                                                                                                                                                                                                                                                                                                                                                                                                                                                                                                                                                                                                                                                                                                                                                                                                                                                                                                                                                                                                                                                                                                                                                                                                                                                                                                                                                                                                                                                                                                                                                                                  |                         |                                                                                                                                                                                                                                                                                                                                                                                                                                                                                                                                                                                                                                                                                                                                                                                                                                                                                                                                                        |
| Produttore materia prima - Raw material manufacturer Sergio Fontana S.r.l. - Italia - Italy Via Mucellato 260 - 75012 Canosa di Puglia (BT) |                                                                                                                                                                                                                                                                                                                                                                                                                                                                                                                                                                                                                                                                                                                                                                                                                                                                                                                                                                                                                                                                                                                                                                                                                                                                                                                                                                                                                                                                                                                                                                                                                                                                                                  |                         |                                                                                                                                                                                                                                                                                                                                                                                                                                                                                                                                                                                                                                                                                                                                                                                                                                                                                                                                                        |
| Data di produzione - Manufacturing date: 28/04/2022                                                                                         |                                                                                                                                                                                                                                                                                                                                                                                                                                                                                                                                                                                                                                                                                                                                                                                                                                                                                                                                                                                                                                                                                                                                                                                                                                                                                                                                                                                                                                                                                                                                                                                                                                                                                                  |                         |                                                                                                                                                                                                                                                                                                                                                                                                                                                                                                                                                                                                                                                                                                                                                                                                                                                                                                                                                        |
| Data di analisi - Analysis date: 28/04/2022                                                                                                 |                                                                                                                                                                                                                                                                                                                                                                                                                                                                                                                                                                                                                                                                                                                                                                                                                                                                                                                                                                                                                                                                                                                                                                                                                                                                                                                                                                                                                                                                                                                                                                                                                                                                                                  |                         |                                                                                                                                                                                                                                                                                                                                                                                                                                                                                                                                                                                                                                                                                                                                                                                                                                                                                                                                                        |
| PROVENIENZA MATERIA                                                                                                                         | China                                                                                                                                                                                                                                                                                                                                                                                                                                                                                                                                                                                                                                                                                                                                                                                                                                                                                                                                                                                                                                                                                                                                                                                                                                                                                                                                                                                                                                                                                                                                                                                                                                                                                            | ORIGIN OF RAW MATERIAL  | China                                                                                                                                                                                                                                                                                                                                                                                                                                                                                                                                                                                                                                                                                                                                                                                                                                                                                                                                                  |
| EPPO DI RACCOLTA                                                                                                                            | Da marzo a giugno                                                                                                                                                                                                                                                                                                                                                                                                                                                                                                                                                                                                                                                                                                                                                                                                                                                                                                                                                                                                                                                                                                                                                                                                                                                                                                                                                                                                                                                                                                                                                                                                                                                                                | HARVEST TIME            | From March to June                                                                                                                                                                                                                                                                                                                                                                                                                                                                                                                                                                                                                                                                                                                                                                                                                                                                                                                                     |
| ATTIVITA DELLA PIANTA                                                                                                                       | Lattone dell'acido brossolitrico                                                                                                                                                                                                                                                                                                                                                                                                                                                                                                                                                                                                                                                                                                                                                                                                                                                                                                                                                                                                                                                                                                                                                                                                                                                                                                                                                                                                                                                                                                                                                                                                                                                                 | ACTIVITY OF THE PLANT   | Hydroxytrich acid lactone                                                                                                                                                                                                                                                                                                                                                                                                                                                                                                                                                                                                                                                                                                                                                                                                                                                                                                                              |
| TIPO DI PRODOTTO ED USO                                                                                                                     | Prodotto per uso professionale con applicazioni in ambito alimentare e cosmetico                                                                                                                                                                                                                                                                                                                                                                                                                                                                                                                                                                                                                                                                                                                                                                                                                                                                                                                                                                                                                                                                                                                                                                                                                                                                                                                                                                                                                                                                                                                                                                                                                 | TYPE OF PRODUCT AND USE | Product for professional use with food and cosmetic applications                                                                                                                                                                                                                                                                                                                                                                                                                                                                                                                                                                                                                                                                                                                                                                                                                                                                                       |
| COMPOSIZIONE                                                                                                                                | Garcinia cambogia fruit extract: 90045-23-1                                                                                                                                                                                                                                                                                                                                                                                                                                                                                                                                                                                                                                                                                                                                                                                                                                                                                                                                                                                                                                                                                                                                                                                                                                                                                                                                                                                                                                                                                                                                                                                                                                                      | COMPOSITION             | Garcinia cambogia fruit extract: 90045-23-1                                                                                                                                                                                                                                                                                                                                                                                                                                                                                                                                                                                                                                                                                                                                                                                                                                                                                                            |
| ALLERGENI                                                                                                                                   | Esente da allergeni alimentari (Reg. 1180/2011/UE, Alleg. II)                                                                                                                                                                                                                                                                                                                                                                                                                                                                                                                                                                                                                                                                                                                                                                                                                                                                                                                                                                                                                                                                                                                                                                                                                                                                                                                                                                                                                                                                                                                                                                                                                                    | ALLERGENS               | Free from food allergens (Reg. 1180/2011/UE, Annex II)                                                                                                                                                                                                                                                                                                                                                                                                                                                                                                                                                                                                                                                                                                                                                                                                                                                                                                 |
| GRANULOMETRIA                                                                                                                               | Non è al di sopra della presenza di allergeni alimentari e non sono presenti particelle superiori a 300 micron                                                                                                                                                                                                                                                                                                                                                                                                                                                                                                                                                                                                                                                                                                                                                                                                                                                                                                                                                                                                                                                                                                                                                                                                                                                                                                                                                                                                                                                                                                                                                                                   | PARTICLE SIZE           | The presence of food allergens is not expected and there are no intentionally added particles > 300 µm                                                                                                                                                                                                                                                                                                                                                                                                                                                                                                                                                                                                                                                                                                                                                                                                                                                 |
| MANIPOLAZIONE                                                                                                                               | Mangiate in loco, provate di un buon sistema di conservazione, rispetto il contatto della polvere con oggetti di accensione, quali fiamme libere, sigarette, ecc.                                                                                                                                                                                                                                                                                                                                                                                                                                                                                                                                                                                                                                                                                                                                                                                                                                                                                                                                                                                                                                                                                                                                                                                                                                                                                                                                                                                                                                                                                                                                | HANDLING                | Handle in well-ventilated room, avoid the contact of powder with fire sources, such as flames and sparks, and                                                                                                                                                                                                                                                                                                                                                                                                                                                                                                                                                                                                                                                                                                                                                                                                                                          |
| CONSERVAZIONE                                                                                                                               | Conservare in contenitori ben chiusi, al riparo da luce, calore e umidità                                                                                                                                                                                                                                                                                                                                                                                                                                                                                                                                                                                                                                                                                                                                                                                                                                                                                                                                                                                                                                                                                                                                                                                                                                                                                                                                                                                                                                                                                                                                                                                                                        | STORAGE                 | Store in well closed containers, away from light, heat and moisture                                                                                                                                                                                                                                                                                                                                                                                                                                                                                                                                                                                                                                                                                                                                                                                                                                                                                    |
| PROPRIETA'                                                                                                                                  | Uso esterno: cutaneo, orale                                                                                                                                                                                                                                                                                                                                                                                                                                                                                                                                                                                                                                                                                                                                                                                                                                                                                                                                                                                                                                                                                                                                                                                                                                                                                                                                                                                                                                                                                                                                                                                                                                                                      | PROPERTIES              | External use: skin conditioner                                                                                                                                                                                                                                                                                                                                                                                                                                                                                                                                                                                                                                                                                                                                                                                                                                                                                                                         |
| BIBLIOGRAFIA                                                                                                                                | 1. Nuova Codex Alimentaria - G. Prosepio                                                                                                                                                                                                                                                                                                                                                                                                                                                                                                                                                                                                                                                                                                                                                                                                                                                                                                                                                                                                                                                                                                                                                                                                                                                                                                                                                                                                                                                                                                                                                                                                                                                         | BIBLIOGRAPHY            | 1. Nuova Codex Alimentaria - G. Prosepio                                                                                                                                                                                                                                                                                                                                                                                                                                                                                                                                                                                                                                                                                                                                                                                                                                                                                                               |
| ANNOZZIONE                                                                                                                                  | Casting - European Commission Database                                                                                                                                                                                                                                                                                                                                                                                                                                                                                                                                                                                                                                                                                                                                                                                                                                                                                                                                                                                                                                                                                                                                                                                                                                                                                                                                                                                                                                                                                                                                                                                                                                                           | NOTES                   | Casting - European Commission Database                                                                                                                                                                                                                                                                                                                                                                                                                                                                                                                                                                                                                                                                                                                                                                                                                                                                                                                 |
| NOTE                                                                                                                                        | AVVERTENZA IMPORTANTE: Qualora si sospetti l'uso del prodotto, interrompere immediatamente l'uso e consultare il medico. Evitare di usare il prodotto in caso di gravidanza o allattamento. Evitare di usare il prodotto in caso di diabete. Evitare di usare il prodotto in caso di ipertensione. Evitare di usare il prodotto in caso di malattie del fegato. Evitare di usare il prodotto in caso di malattie del cuore. Evitare di usare il prodotto in caso di malattie dei reni. Evitare di usare il prodotto in caso di malattie del sistema circolatorio. Evitare di usare il prodotto in caso di malattie del sistema respiratorio. Evitare di usare il prodotto in caso di malattie del sistema digestivo. Evitare di usare il prodotto in caso di malattie del sistema urinario. Evitare di usare il prodotto in caso di malattie del sistema muscolare. Evitare di usare il prodotto in caso di malattie del sistema nervoso. Evitare di usare il prodotto in caso di malattie del sistema endocrino. Evitare di usare il prodotto in caso di malattie del sistema immunitario. Evitare di usare il prodotto in caso di malattie del sistema circolatorio. Evitare di usare il prodotto in caso di malattie del sistema respiratorio. Evitare di usare il prodotto in caso di malattie del sistema digestivo. Evitare di usare il prodotto in caso di malattie del sistema urinario. Evitare di usare il prodotto in caso di malattie del sistema muscolare. Evitare di usare il prodotto in caso di malattie del sistema nervoso. Evitare di usare il prodotto in caso di malattie del sistema endocrino. Evitare di usare il prodotto in caso di malattie del sistema immunitario. | NOTES                   | IMPORTANT WARNING: In the event of suspected use of the product, immediately discontinue use and consult your doctor. Do not use the product during pregnancy or breastfeeding. Do not use the product if you are diabetic. Do not use the product if you have high blood pressure. Do not use the product if you have liver disease. Do not use the product if you have heart disease. Do not use the product if you have kidney disease. Do not use the product if you have circulatory system diseases. Do not use the product if you have respiratory system diseases. Do not use the product if you have digestive system diseases. Do not use the product if you have urinary system diseases. Do not use the product if you have muscular system diseases. Do not use the product if you have nervous system diseases. Do not use the product if you have endocrine system diseases. Do not use the product if you have immune system diseases. |

Le informazioni sopra riportate non si escludono dall'obbligo di identificare e controllare il prodotto prima dell'uso. L'utente deve essere consapevole che il prodotto è un integratore alimentare e non un medicinale. Le informazioni sopra riportate non si escludono dall'obbligo di identificare e controllare il prodotto prima dell'uso. L'utente deve essere consapevole che il prodotto è un integratore alimentare e non un medicinale.

Responsabile Qualità / Head of Quality  
Dott.ssa Mariagrazia Roselli

Figure S1. Technical data sheet of the *Garcinia cambogia* fruit standardized extract.
